# Supplementary material for: Mapping and Identification of Genetic Loci Affecting Earliness of Bolting and Flowering in Lettuce
Source: Research Square preprint supplement (doi:10.21203/rs.3.rs-432642/v1), 2021-04-26
Supplement: Supplementary file 1 [file 62adae80d373ed3a47031adf.xlsx]

## Sheet: Supp1 -FM 7.2 markers primers
Mapping and identification of genetic loci affecting earliness of bolting and flowering in lettuce
Leah Rosental, David W. Still, Youngsook You, Ryan J. Hayes, Ivan Simko
Supplementary Table 1 High Resolution Melting markers used for fine mapping of the qBLT/qFLT7.2 locus
Marker1	LG/chr	cM distance3	Polymorphism position2	Forward primer	Reverse primer
LZ093	7	0	185553523	AGTTTTCAACTTGGGAAGACCTC	AGGGAGGTGTTGGTAATCTTTGT
LZ231	7	15.631	203346114	CAACCAATTTTGGGGGTATC	ATGAGTGGCGGTGAAGATG
LZ185	7	20.024	196654928	TCCAGGAAAATCTCCGACAG	TCGTTTACAGCCCTGAAGGT
LZ189	7	28.326	199314036	CCATATGAGCCTGAAAGAAAGAA	GCATCTTTATCAATTCAAGCTTCC
LZ097	7	35.292	202117392	TTACTGTGAGATGAGGACGAAGC	CAAAATCAACCAAACTCACCATT
LZ223	7	37.734	204470047	CGAATTAAAGCACAAATGATGAA	TTTTGCTGGTCCATGTGTTG
LZ193	7	43.72	206923589	GGCCTCCGAAAAAGAGAAAG	GCCACGTCAGCATCTGTTT
LZ085	7	45.565	207702411	CCCCATTCTTGTTCGTGACT	CCGGTGGTGATACGAGTTCT
LZ431	7	46.543	208859750	CCATGGAGGAGGGGTGTTTT	CATGTCGTTTGCCATGTATAAGT
LZ481	7	46.543	208969219	TTTTGACCGCTTGGAGCCTT	ACTTGAGACCTGCATATTACCCA
LZ261	7	46.543	209018006	CTCATTTACTGCACCCCAAGT	ATGTAAATGACTGAAAATATAGTGGCT
LZ299	7	46.543	209023372	CCCAGGTGTGTGCTCTTTGT	TCCACGATTGACATGATCACA
LZ425	7	46.543	209089838	TTACGGGGGTTTTGGGGTTT	AAGCAGCTTGTGTGGACCTT
LZ225	7	46.723	209071520	AATTGAGATTAAAGCGATGATCC	GATTTTGAATGATGTTTATGATGATG
LZ217	7	48.263	209159985	GGCTTCAACTACCTCGATGC	ATTGGAATTGGGTGTGGTGT
LZ197	7	57.659	215390683	GTGCGACCTGCTTGAAGAAT	TTTGCAGGACTTGTGTCGAA
LZ199	7	62.937	216897788	ACGGATTCCCTTCGAATGTT	CCAAGGTTGTTGGCAGGTAA
LZ203	7	72.732	222857520	CTAGCGGTGAGAGCAGCAC	GACAGGGTGAGATCGAGAGC
LZ129	7	80.427	226400320	TGGTGGCAGTTAAGGTGAGA	GGAGATCCGGGTTCGTTATC
LZ105	7	4 >130	231232366	AAAACATCGGGTACTTCCTCTTC	CAACGACTCAACGTATTTCACAA
LZ001	2	18	41338728	TTGGTTGTTGGACGTGTGAT	GACTTGGAGCATCAGGATCG
1Marker names are named in order designed, not by location.
2 genomic positions (genome v. 4) of the beginning of the sequence that was used to design the primers
3Distance in cM based on genotyping of these markers on the recombinant F2 plants
4LZ105 exceeded 50 cM distance from LZ129, when considering only the recombinant F2 plants

## Sheet: Supp2 GeXP
Mapping and identification of genetic loci affecting earliness of bolting and flowering in lettuce
Leah Rosental, David W. Still, Youngsook You, Ryan J. Hayes, Ivan Simko
Supplementary Table 2- List of genes whose expression was analyzed with the GeXP multiplex system
	Code Name	L. sativa gene	description	Arabidopsis homolog	Forward primer	Reverse primer	L. sativa - Arabidopsis protein homology
Genes in the qFLT7.2 locus
1	7b_1	Lsat_1_v5_gn_7_97260.1	hypothetical protein, U-box domain-containing	AT2G04240.1	TTACATCTCCCTCCGTCGTC	ATTCTTCACATCGGGCAAGT
2	7b_3	Lsat_1_v5_gn_7_97320.1	heterogeneous nuclear ribonucleoprotein A1/A3	AT3G13224.2	GATCTGACTTTGGTGACGGC	GAGCCTTTGGGAATGGTTCT
3	7b_4	Lsat_1_v5_gn_7_97240.1	CONSTANS-like 9	AT3G07650.1	GGAAGCGAGATCAATGGTGT	GGCAACCCGAGTAACAATTC	47% identity, 56 % positive amino acid alignment, e value of 1e-90
4	7b_5	Lsat_1_v5_gn_7_97220.1	unknown protein	AT2G04235.1	AGTGACTGGTGCCCTTTTTG	ATCCGCAAGTATTGGTGAGG
5	7b_6	Lsat_1_v5_gn_7_97980.1	P24 SUBFAMILY BETA 2; DEAD (Asp-Glu-Ala-Asp) box polypeptide 55	AT3G07680.1	GAGCATTTCAAGCCGTTGTT	TTCAAACAAACGTTGCAGGA
6	7b_7	Lsat_1_v5_gn_7_97960.1	unknown protein	AT4G25330.1	TTTGATGCCATTGTTGATGC	GACAAAAATGGAGCCTTGGA
7	7b_8	Lsat_1_v5_gn_7_97301.1	Kinase-related protein of unknown function	AT3G07660.1	GCCCTCCTACCACATCTTCA	CAATCATTGGTGGCATGAAC
8	7b_9	Lsat_1_v5_gn_7_97281.1	ARM repeat superfamily protein;	AT4G12710.1	CCATTAATCCCCGATGCTAA	AATTGCGGATTTCCCTTCTT
9	7b_10	Lsat_1_v5_gn_7_96941.1	phytochrome C	AT5G35840.1	CCGTTGGTAGTTTCGGTTGT	ATGGCGCAAGTAAGTCACCT	52% identity, 73% positive amino acid alignment, e value 1e-95
10	7b_11	Lsat_1_v5_gn_7_97020.1	FAR1-related sequence 10,regulation of transcription, DNA-templated, response to red or far red light	AT5G28530.1	TATGCAACAACCGATATGGC	CAGAGAAGTATCAACCCGCC
11	7b_12	Lsat_1_v5_gn_7_97480.1	similar to KAK (KAKTUS) HECT-domain (ubiquitin-transferase)	AT4G38600.1	ATGGCTCAAAAACCCAGATG	TGGATGTGTATCCATGGTCG
12	7b_13	Lsat_1_v5_gn_7_96781.1	nuclear factor Y, subunit B3, regulation of transcription, DNA-templated, transcription	AT4G14540.1	TACGTGGAGCCTCTGAAGGT	ACCCCATACCCATTTGATGA
Flowering time target genes
13	APL1	Lsat_1_v5_gn_3_89681.2	AP2 (APETALA 2) like Integrase-type DNA-binding superfamily protein	AT2G39250	ATGTAATGGAAAAGCCGCTG	TCTCCTCCCTCATTCATCGT
14	CO11	Lsat_1_v5_gn_2_86121.1	CO (CONSTANS);transcription factor/ transcription regulator/ zinc ion binding	AT5G15840	AGTGGAGAAGGAGGTGACGA	CGACTCCCACTTCCAATGAT
15	DOG1	Lsat_1_v5_gn_9_99800.1	Delay of Germination1	AT5G45830	ACTCACCAACTACCCAACCG	GCTGGTCTACAACCACCGAT
16	LsFT	Lsat_1_v5_gn_2_17881.1	FLOWERING LOCUS T	AT1G65480.1	CAATGGGTGCGAGCTAAAAC	GACGGCCTTGGACTCTCATA
17	MAD1	Lsat_1_v5_gn_7_6780.1	AGL6 (AGAMOUS-LIKE 6) | DNA binding /MADS-box transcription factor	AT2G45650	TTGAACGCTTCATCAACCAG	AAGATGCGCCCAACACATA
18	MAD2	Lsat_1_v5_gn_2_90281.1	AGL8_SOLTU Agamous-like MADS-box protein AGL8 homolog	AT1G69120	AGGCAAGCTGGACTCTTGAA	TTGTTGCTCCACATTTTGAA
19	MAD3	Lsat_1_v5_gn_2_89920.1	SEP1 (SEPALLATA1) | DNA binding / transcription factor | K09264 MADS-box transcription factor	AT5G15800	AATGGCTTTTCTTGATTCCTTC	TCCGCCTGTGTATTCTTTTTG
20	MAD4	Lsat_1_v5_gn_6_111621.1	AGL11_ARATH Agamous-like DNA binding MADS-box protein	AT4G18960	CAACACGTTCCTTCGTTCAA	CGCAAGGTATGCTTGAATTG
21	MAD5	Lsat_1_v5_gn_6_105061.1	SHP1 (SHATTERPROOF 1) | DNA binding / protein binding / transcription factor | K09264 MADS-box	AT3G58780	GTCGAGGAAAAGGAGAAGGG	AACAAGCACAAAACCAAGCA
22	MAD6	Lsat_1_v5_gn_6_107221.1	AGL44 (AGAMOUS-LIKE 44) | DNA binding / transcription factor | K09264 MADS-box transcription factor	AT2G14210	CTCAATCGGGAAACCAGAGA	TTGAGGGTGAATTTCTGATGC
23	MAD7	Lsat_1_v5_gn_4_861.2	AGL31_ARATH Agamous-like MADS-box protein	AT5G15800	TTCGAAAACGCCACTAACCT	GCGGCTGAGGGATAGAAATA
24	PIF3	Lsat_1_v5_gn_5_179121.1	PIF3 (PHYTOCHROME INTERACTING FACTOR 3) | DNA binding / protein binding / transcription factor/	AT1G09530	GCTGCAGAGGTCCACAATCT	TGGGAACATCATAGGAACCA
25	R156	lsa-m1054	miRNA 156 pre-proccessed		GAGTGAGCACACAAAGGCAA	ATCCAACAAGGATCGAGTGC
26	SOC1	Lsat_1_v5_gn_4_37340.1	suppresser of CO	AT2G45660	TTTTCCATTACTTAAATTCTTGCAT	CCGTGATATGACACACACCC
27	SPL6	Lsat_1_v5_gn_9_28021.1	SPL6; SQUAMOSA PROMOTER BINDING PROTEIN (SBP)-domain transcription factor 6	AT1G69170	TTCTTTCCCGAATTGCAAAC	ACTAGCAAAAGAGGGCAGCA
Reference genes
28	TIP4	Lsat_1_v5_gn_5_116421.1	TIP41-like protein TIP41;type 2A phosphatase activator	AT4G34270	TTAAGCACATGAGCAGTGGC	CTGAATTTCCAGTGTGCAGC
29	PP23	Lsat_1_v5_gn_4_18660.1	Protein phosphatase 2A regulatory subunit A3	AT1G13320	AGTCCGGAGCTTGCTATTCA	CCTTCCCTAAAACAGGAGCC
30	PP21	Lsat_1_v5_gn_8_160621.1	Protein phosphatase 2A-1	AT1G59830	GGACGATTCTTGTGGAGGAA	CGCGATCAACATAATCTCCC
Table Supp- LsFT Real time assay primers
Custom TaqMan® Gene Expression Assay
gene		forward primer	reverse primer	reported dye	probe	assay_target_position
LsFT	target	TGCATTGGTTGGTGACCGATAT	CCTTGGACTCTCATAGCACACAATT	FAM	ACGGGAGCACGTTTTG	TGCATTGGTTGGTGACCGATATACC
PP23	reference	AGAGAAGCTGCTGCTAACAATTTGA	GCCCAATCCGGACCAAAC	VIC	TCCTCCGCAAGTCTCT	AAGAGACTTGCGGAGGAGTTTGGTC

## Sheet: supp3 models
Mapping and identification of genetic loci affecting earliness of bolting and flowering in lettuce
Leah Rosental, David W. Still, Youngsook You, Ryan J. Hayes, Ivan Simko
Supplementary Table 3 the QTL models fit and anova summary
The follwowing tables detail the QTL models and anova summerized in Table 2 (Row from Table 2 highlighted in bold)
QTL are named by chromosome number then @ followed by location (in CM) as found in Table 1
QTLs where the interaction among them was significant are marked with x between them, while QTLs preceded by + have an additive effect.
BIC is the Bayesian Information Criterion
Signif. Codes of the Drop one QTL at a time ANOVA tables: 0 ‘***’ 0.001 ‘**’ 0.01 ‘*’ 0.05 ‘.’ 0.1 ‘ ’ 1
DBLT
condition	LOD	% variance explained	p-value (F) model	Positions included in model
LD-HT	16.2	46.7	0.000888	p2.1 x p3.1 x p6.1 x p7.2 x p8.1 + p9.1			df	SS	MS	LOD	%var	Pvalue(Chi2)	Pvalue(F)
BIC	-50.41					Model	32	778.782	24.3369	16.2931	46.7687	2.59565e-05	0.000888283
						Error	86	886.395	10.3069
						Total	118	1665.18
Drop one QTL at a time ANOVA table:
	df	Type III SS	LOD	%var	F value	Pvalue(Chi2)	Pvalue(F)
2@18.1	16	238.608	6.15981	14.3293	1.4469	0.029	0.1397
6@100.3	16	345.208	8.49919	20.731	2.0933	0.001	0.01563	*
7@94.1	16	404.595	9.7161	24.2974	2.4534	0	0.00418	**
3@57.3	16	285.297	7.21057	17.1331	1.73	0.007	0.05583	.
8@34.6	16	255.168	6.53743	15.3238	1.5473	0.017	0.10192
9@17.9	1	69.815	1.9591	4.1927	6.7736	0.003	0.01089	*
2@18.1:6@100.3	8	202.335	5.31292	12.151	2.4539	0.002	0.01921	*
2@18.1:7@94.1	8	97.316	2.6918	5.8442	1.1802	0.134	0.3204
2@18.1:3@57.3	8	125.255	3.41549	7.522	1.5191	0.046	0.16245
2@18.1:8@34.6	8	66.274	1.86322	3.98	0.8038	0.379	0.60096
6@100.3:7@94.1	8	126.102	3.43711	7.5729	1.5293	0.045	0.15895
6@100.3:3@57.3	8	219.671	5.72116	13.1921	2.6641	0.001	0.01159	*
6@100.3:8@34.6	8	220.945	5.75088	13.2685	2.6796	0.001	0.01117	*
7@94.1:3@57.3	8	123.108	3.36058	7.3931	1.493	0.051	0.17161
7@94.1:8@34.6	8	83.993	2.33942	5.0441	1.0186	0.215	0.42833
3@57.3:8@34.6	8	183.427	4.86021	11.0155	2.2246	0.004	0.0331
2@18.1:6@100.3:7@94.1	4	52.512	1.48722	3.1535	1.2737	0.144	0.28663
2@18.1:6@100.3:3@57.3	4	102.152	2.81852	6.1346	2.4778	0.011	0.05	.
2@18.1:6@100.3:8@34.6	4	51.493	1.45917	3.0924	1.249	0.151	0.29643
2@18.1:7@94.1:3@57.3	4	50.317	1.42673	3.0217	1.2205	0.16	0.30812
2@18.1:7@94.1:8@34.6	4	33.309	0.95324	2.0003	0.8079	0.356	0.52347
2@18.1:3@57.3:8@34.6	4	43.477	1.23735	2.6109	1.0546	0.223	0.38408
6@100.3:7@94.1:3@57.3	4	21.161	0.60964	1.2708	0.5133	0.591	0.72613
6@100.3:7@94.1:8@34.6	4	37.208	1.06256	2.2345	0.9025	0.298	0.46626
6@100.3:3@57.3:8@34.6	4	176.823	4.70019	10.6188	4.2889	0	0.00327	**
7@94.1:3@57.3:8@34.6	4	58.228	1.64405	3.4968	1.4123	0.109	0.23671
2@18.1:6@100.3:7@94.1:3@57.3	2	13.467	0.38965	0.8088	0.6533	0.408	0.52288
2@18.1:6@100.3:7@94.1:8@34.6	2	28.778	0.82563	1.7283	1.3961	0.149	0.25312
2@18.1:6@100.3:3@57.3:8@34.6	2	41.359	1.17844	2.4838	2.0064	0.066	0.14072
2@18.1:7@94.1:3@57.3:8@34.6	2	16.661	0.4812	1.0006	0.8083	0.33	0.44899
6@100.3:7@94.1:3@57.3:8@34.6	2	5.037	0.14642	0.3025	0.2443	0.714	0.78377
2@18.1:6@100.3:7@94.1:3@57.3:8@34.6	1	2.206	0.06422	0.1325	0.214	0.587	0.64482
condition	LOD	% variance explained	p-value (F) model	Positions included in model
LD-LT	17.3	47.5	1.11e-16	p7.1 x p7.2			df	SS	MS	LOD	%var	Pvalue(Chi2)	Pvalue(F)
BIC	-60.667					Model	3	2637.01	879.003	17.3604	47.5201	0	1.11022e-16
						Error	120	2912.24	24.2687
						Total	123	5549.25
Drop one QTL at a time ANOVA table:
	df	Type III SS	LOD	%var	F value	Pvalue(Chi2)	Pvalue(F)
7@94.1	2	2266.06	15.4975	40.835	46.687	0	9.99e-16	***
7@5.0	2	219.13	1.9534	3.949	4.515	0.011	0.0129	*
7@94.1:7@5.0	1	88.13	0.8028	1.588	3.631	0.055	0.0591	.
condition	LOD	% variance explained	p-value (F) model	Positions included in model
SD-HT	3.7	13.6	3.53e-05	p8.1			df	SS	MS	LOD	%var	Pvalue(Chi2)	Pvalue(F)
BIC	-7.91576					Model	1	920.1	920.1	3.79443	13.6568	2.91263e-05	3.5314e-05
condition	LOD	% variance explained	p-value (F) model	Positions included in model
SD-LT	16.46	46.013	0.000402834	p2.1 x p6.1 x p7.2 x p8.1 x p9.1			df	SS	MS	LOD	%var	Pvalue(Chi2)	Pvalue(F)
BIC	-27.6993					Model	31	2170.33	70.0106	16.4643	46.0133	1.26503e-05	0.000402834
						Error	91	2546.42	27.9826
						Total	122	4716.75
Drop one QTL at a time ANOVA table:
	df	Type IIISS	LOD	%var	F	Pvalue(Chi2)	Pvalue(F)
2@18.1	16	631.63	5.9182	13.3912	1.4108	0.039	0.154432
6@100.3	16	453.46	4.3772	9.6138	1.0128	0.213	0.451059
7@94.1	16	1372.57	11.5155	29.1	3.0657	0	0.000382	***
8@34.6	16	701.27	6.4971	14.8677	1.5663	0.018	0.094456	.
9@17.9	16	626.54	5.8754	13.2833	1.3994	0.041	0.159876
2@18.1:6@100.3	8	230.18	2.3114	4.88	1.0282	0.223	0.420832
2@18.1:7@94.1	8	330.25	3.2571	7.0017	1.4753	0.059	0.177176
2@18.1:8@34.6	8	285.16	2.8351	6.0457	1.2738	0.11	0.266987
2@18.1:9@17.9	8	239.21	2.3981	5.0714	1.0686	0.199	0.392137
6@100.3:7@94.1	8	254.05	2.54	5.3861	1.1349	0.165	0.347848
6@100.3:8@34.6	8	318.05	3.1435	6.7429	1.4207	0.07	0.198514
6@100.3:9@17.9	8	270.09	2.6926	5.7263	1.2065	0.134	0.304125
7@94.1:8@34.6	8	223.33	2.2454	4.7348	0.9976	0.242	0.443458
7@94.1:9@17.9	8	374.96	3.669	7.9496	1.675	0.031	0.115184
8@34.6:9@17.9	8	286.2	2.8449	6.0677	1.2785	0.108	0.264562
2@18.1:6@100.3:7@94.1	4	126.45	1.2945	2.6809	1.1297	0.202	0.347511
2@18.1:6@100.3:8@34.6	4	141.41	1.4435	2.9981	1.2634	0.156	0.290209
2@18.1:6@100.3:9@17.9	4	27.78	0.2898	0.5891	0.2482	0.855	0.910051
2@18.1:7@94.1:8@34.6	4	120.92	1.2391	2.5637	1.0803	0.222	0.370972
2@18.1:7@94.1:9@17.9	4	170.19	1.728	3.6082	1.5205	0.093	0.20281
2@18.1:8@34.6:9@17.9	4	201.46	2.0337	4.2711	1.7999	0.053	0.135674
6@100.3:7@94.1:8@34.6	4	146.02	1.4893	3.0958	1.3046	0.144	0.274275
6@100.3:7@94.1:9@17.9	4	187.76	1.9001	3.9806	1.6774	0.068	0.162025
6@100.3:8@34.6:9@17.9	4	73.04	0.7553	1.5485	0.6526	0.481	0.626548
7@94.1:8@34.6:9@17.9	4	74.72	0.7724	1.584	0.6675	0.469	0.616173
2@18.1:6@100.3:7@94.1:8@34.6	2	95	0.9783	2.014	1.6974	0.105	0.188901
2@18.1:6@100.3:7@94.1:9@17.9	2	20.7	0.2162	0.4388	0.3698	0.608	0.691917
2@18.1:6@100.3:8@34.6:9@17.9	2	10.54	0.1103	0.2235	0.1883	0.776	0.828661
2@18.1:7@94.1:8@34.6:9@17.9	2	18.29	0.1912	0.3878	0.3268	0.644	0.722037
6@100.3:7@94.1:8@34.6:9@17.9	2	24.05	0.251	0.5098	0.4297	0.561	0.652044
2@18.1:6@100.3:7@94.1:8@34.6:9@17.9	1	0	0	0	0	1	1
						Error	117	5817.19	49.7196
						Total	118	6737.29
DFLT
condition	LOD	% variance explained	p-value (F) model	Positions included in model
LD-HT	39.4	83.1	0	p2.1 x p6.1 x p7.1 x p7.2 x p9.1			df	SS	MS	LOD	%var	Pvalue(Chi2)	Pvalue(F)
BIC	-135.25					Model	31	29385	947.902	39.4141	83.1277	0	0
						Error	70	5964.22	85.2031
						Total	101	35349.2
Drop one QTL at a time ANOVA table:
	df	Type III SS	LOD	%var	F value	Pvalue(Chi2)	Pvalue(F)
2@18.1	16	2517.96	7.8006	7.1231	1.84702	0.003	0.041504	*
6@100.3	16	4313.3	12.0531	12.202	3.16398	0	0.000444	***
7@5.0	16	4075.57	11.5347	11.5295	2.9896	0	0.000813	***
7@94.1	16	20669.6	33.1439	58.4727	15.162	0	< 2e-16	***
9@17.9	16	5750.1	14.9513	16.2666	4.21794	0	1.26e-05	***
2@18.1:6@100.3	8	1463.56	4.8606	4.14031	2.14717	0.004	0.042377	*
2@18.1:7@5.0	8	1814.11	5.882	5.13196	2.66144	0.001	0.013052	*
2@18.1:7@94.1	8	1228.55	4.1485	3.47547	1.80239	0.014	0.091139	.
2@18.1:9@17.9	8	1314.91	4.4128	3.71978	1.92909	0.009	0.069015	.
6@100.3:7@5.0	8	1893.25	6.1062	5.35585	2.77755	0	0.009976	**
6@100.3:7@94.1	8	2167.29	6.8655	6.1311	3.1796	0	0.003928	**
6@100.3:9@17.9	8	1421.62	4.7351	4.02164	2.08563	0.005	0.048678	*
7@5.0:7@94.1	8	2648.16	8.138	7.49142	3.88506	0	0.000773	***
7@5.0:9@17.9	8	2180.01	6.9001	6.16706	3.19825	0	0.003762	**
7@94.1:9@17.9	8	2065.62	6.5868	5.84347	3.03043	0	0.005551	**
2@18.1:6@100.3:7@5.0	4	991.251	3.4054	2.80417	2.90849	0.003	0.027557	*
2@18.1:6@100.3:7@94.1	4	809.663	2.8195	2.29047	2.37569	0.011	0.060211	.
2@18.1:6@100.3:9@17.9	4	632.775	2.2334	1.79007	1.85667	0.036	0.127781
2@18.1:7@5.0:7@94.1	4	213.736	0.7798	0.60464	0.62714	0.464	0.644725
2@18.1:7@5.0:9@17.9	4	1236.59	4.1732	3.4982	3.62834	0.001	0.009589	**
2@18.1:7@94.1:9@17.9	4	586.931	2.079	1.66038	1.72215	0.048	0.154815
6@100.3:7@5.0:7@94.1	4	621.59	2.1958	1.75843	1.82385	0.039	0.133927
6@100.3:7@5.0:9@17.9	4	1260.22	4.2458	3.56507	3.6977	0.001	0.008666	**
6@100.3:7@94.1:9@17.9	4	733.683	2.5696	2.07553	2.15275	0.019	0.083332	.
7@5.0:7@94.1:9@17.9	4	1781.84	5.7899	5.04068	5.22821	0	0.000962	***
2@18.1:6@100.3:7@5.0:7@94.1	2	-3.931	-0.0146	-0.01112	-0.02307	1	1
2@18.1:6@100.3:7@5.0:9@17.9	2	629.142	2.2212	1.77979	3.69201	0.006	0.029898	*
2@18.1:6@100.3:7@94.1:9@17.9	2	118.07	0.4342	0.33401	0.69288	0.368	0.503533
2@18.1:7@5.0:7@94.1:9@17.9	2	95.97	0.3536	0.27149	0.56318	0.443	0.571952
6@100.3:7@5.0:7@94.1:9@17.9	2	557.305	1.9786	1.57657	3.27045	0.011	0.043869	*
2@18.1:6@100.3:7@5.0:7@94.1:9@17.9	1	0	0	0	0	1	1
condition	LOD	% variance explained	p-value (F) model	Positions included in model
LD-LT	45.1	83.811	0	p2.1 x p6.1 x p7.1 x p7.2 x p9.1			df	SS	MS	LOD	%var	Pvalue(Chi2)	Pvalue(F)
						Model	31	60199.1	1941.91	45.0747	83.8111	0	0
						Error	82	11628	141.805
						Total	113	71827.1
Drop one QTL at a time ANOVA table:
	df	Type III SS	LOD	%var	F value	Pvalue(Chi2)	Pvalue(F)
2@18.1	16	6470.17	10.9514	9.00798	2.8517	0	0.001015	**
6@100.3	16	8764.52	13.9061	12.2022	3.8629	0	2.52e-05	***
7@94.1	16	42742.2	38.1818	59.507	18.8385	0	< 2e-16	***
7@5.0	16	7989.52	12.9469	11.1233	3.5214	0	8.67e-05	***
9@17.9	16	9539.5	14.8294	13.2812	4.2045	0	7.44e-06	***
2@18.1:6@100.3	8	3081.94	5.82003	4.29077	2.7167	0.001	0.010475	*
2@18.1:7@94.1	8	3282.18	6.15475	4.56956	2.8932	0	0.006859	**
2@18.1:7@5.0	8	2507.22	4.83346	3.49063	2.2101	0.004	0.034777	*
2@18.1:9@17.9	8	2757.53	5.26799	3.83912	2.4307	0.002	0.0207	*
6@100.3:7@94.1	8	4591.95	8.23903	6.39306	4.0478	0	0.000429	***
6@100.3:7@5.0	8	4506.23	8.10787	6.27372	3.9722	0	0.000513	***
6@100.3:9@17.9	8	5564.59	9.68066	7.74719	4.9051	0	5.69e-05	***
7@94.1:7@5.0	8	5479.52	9.55787	7.62876	4.8302	0	6.77e-05	***
7@94.1:9@17.9	8	6356.99	10.7961	8.85041	5.6036	0	1.15e-05	***
7@5.0:9@17.9	8	6755.99	11.3393	9.4059	5.9554	0	5.2e-06	***
2@18.1:6@100.3:7@94.1	4	1424.1	2.86	1.98268	2.5107	0.01	0.047981	*
2@18.1:6@100.3:7@5.0	4	374.95	0.78562	0.52201	0.661	0.46	0.620842
2@18.1:6@100.3:9@17.9	4	1517.26	3.03606	2.11238	2.6749	0.007	0.037541	*
2@18.1:7@94.1:7@5.0	4	1268.33	2.56278	1.7658	2.236	0.019	0.072171	.
2@18.1:7@94.1:9@17.9	4	694.59	1.43623	0.96703	1.2246	0.158	0.306824
2@18.1:7@5.0:9@17.9	4	1942.52	3.82421	2.70444	3.4246	0.001	0.012194	*
6@100.3:7@94.1:7@5.0	4	2896.7	5.50632	4.03288	5.1068	0	0.001005	**
6@100.3:7@94.1:9@17.9	4	2688.27	5.14852	3.7427	4.7394	0	0.001722	**
6@100.3:7@5.0:9@17.9	4	3741.67	6.90609	5.20927	6.5965	0	0.000118	***
7@94.1:7@5.0:9@17.9	4	4418.99	7.97366	6.15226	7.7906	0	2.26e-05	***
2@18.1:6@100.3:7@94.1:7@5.0	2	109.08	0.23113	0.15186	0.3846	0.587	0.681938
2@18.1:6@100.3:7@94.1:9@17.9	2	309.46	0.65019	0.43083	1.0911	0.224	0.340661
2@18.1:6@100.3:7@5.0:9@17.9	2	177.51	0.37504	0.24713	0.6259	0.422	0.537319
2@18.1:7@94.1:7@5.0:9@17.9	2	575.71	1.19625	0.80152	2.0299	0.064	0.137892
6@100.3:7@94.1:7@5.0:9@17.9	2	1318.68	2.65923	1.8359	4.6496	0.002	0.012224	*
2@18.1:6@100.3:7@94.1:7@5.0:9@17.9	1	38.05	0.08087	0.05297	0.2683	0.542	0.605862
condition	LOD	% variance explained	p-value (F) model	Positions included in model
SD-HT	22.981	61.129	2.44954e-07	p2.1 x p3.1 x p6.1 x p7.1 x p9.1			df	SS	MS	LOD	%var	Pvalue(Chi2)	Pvalue(F)
BIC	-58.6472					Model	31	16294.6	525.633	22.9812	61.1293	4.1795e-10	2.44954e-07
						Error	80	10361.4	129.517
						Total	111	26656
Drop one QTL at a time ANOVA table:
	df	Type III SS	LOD	%var	F value	Pvalue(Chi2)	Pvalue(F)
2@18.1	16	8244.9	14.2375	30.931	3.979	0	1.8e-05	***
3@57.3	16	6435.8	11.7499	24.144	3.106	0	0.000417	***
6@100.3	16	5605.4	10.5168	21.029	2.705	0	0.001806	**
9@17.9	16	5886.8	10.9416	22.084	2.841	0	0.001099	**
7@5.0	16	2235.5	4.7514	8.387	1.079	0.147	0.388776
2@18.1:3@57.3	8	4874.2	9.3768	18.286	4.704	0	9.5e-05	***
2@18.1:6@100.3	8	3350.7	6.8144	12.57	3.234	0	0.003084	**
2@18.1:9@17.9	8	3050.6	6.2763	11.444	2.944	0	0.006169	**
2@18.1:7@5.0	8	1617.9	3.5287	6.069	1.561	0.039	0.149738
3@57.3:6@100.3	8	3183	6.5151	11.941	3.072	0	0.004544	**
3@57.3:9@17.9	8	1846.6	3.9886	6.927	1.782	0.019	0.092791	.
3@57.3:7@5.0	8	1557.5	3.4057	5.843	1.503	0.047	0.169287
6@100.3:9@17.9	8	1803	3.9017	6.764	1.74	0.021	0.101804
6@100.3:7@5.0	8	1154.9	2.57	4.333	1.115	0.159	0.362509
9@17.9:7@5.0	8	1088.1	2.4287	4.082	1.05	0.191	0.406331
2@18.1:3@57.3:6@100.3	4	2712.8	5.6558	10.177	5.236	0	0.000848	***
2@18.1:3@57.3:9@17.9	4	1707	3.709	6.404	3.295	0.002	0.01493	*
2@18.1:3@57.3:7@5.0	4	1222	2.7115	4.584	2.359	0.014	0.06038	.
2@18.1:6@100.3:9@17.9	4	1537.8	3.3656	5.769	2.968	0.004	0.024334	*
2@18.1:6@100.3:7@5.0	4	917.3	2.0631	3.441	1.771	0.05	0.142918
2@18.1:9@17.9:7@5.0	4	1021.5	2.2868	3.832	1.972	0.032	0.106748
3@57.3:6@100.3:9@17.9	4	1400.7	3.0838	5.255	2.704	0.007	0.036141	*
3@57.3:6@100.3:7@5.0	4	581.4	1.3277	2.181	1.122	0.191	0.351975
3@57.3:9@17.9:7@5.0	4	778.7	1.7624	2.921	1.503	0.087	0.209149
6@100.3:9@17.9:7@5.0	4	865.6	1.9512	3.247	1.671	0.061	0.164939
2@18.1:3@57.3:6@100.3:9@17.9	2	1339.3	2.9564	5.024	5.17	0.001	0.007732	**
2@18.1:3@57.3:6@100.3:7@5.0	2	531.8	1.2173	1.995	2.053	0.061	0.135052
2@18.1:3@57.3:9@17.9:7@5.0	2	694.1	1.5769	2.604	2.679	0.026	0.074754	.
2@18.1:6@100.3:9@17.9:7@5.0	2	846.8	1.9105	3.177	3.269	0.012	0.043189	*
3@57.3:6@100.3:9@17.9:7@5.0	2	508.8	1.166	1.909	1.964	0.068	0.14695
2@18.1:3@57.3:6@100.3:9@17.9:7@5.0	1	301.2	0.6969	1.13	2.326	0.073	0.131202
condition	LOD	% variance explained	p-value (F) model	Positions included in model
SD-LT	13.4	77.005	4.93e-05	p2.1 x p6.1 x p7.2 x p9.1			df	SS	MS	LOD	%var	Pvalue(Chi2)	Pvalue(F)
BIC	-31.833					Model	15	21946.7	1463.11	13.4055	77.0046	1.26608e-07	4.92976e-05
						Error	26	6553.81	252.069
						Total	41	28500.5
Drop one QTL at a time ANOVA table:
	df	Type III SS	LOD	%var	F value	Pvalue(Chi2)	Pvalue(F)
2@18.1	8	4820.4	5.028	16.9135	2.3904	0.003	0.044361	*
6@100.3	8	10405.2	8.671	36.5087	5.1599	0	0.000636	***
7@94.1	8	7397.4	6.8905	25.9553	3.6683	0	0.005497	**
9@17.9	8	12421.1	9.6954	43.582	6.1596	0	0.000175	***
2@18.1:6@100.3	4	3868.9	4.2312	13.5747	3.8371	0.001	0.013997	*
2@18.1:7@94.1	4	1657.4	2.0562	5.8153	1.6438	0.05	0.193341
2@18.1:9@17.9	4	4220.2	4.5336	14.8076	4.1856	0	0.009512	**
6@100.3:7@94.1	4	1821.7	2.2369	6.3918	1.8067	0.036	0.157831
6@100.3:9@17.9	4	6768.5	6.4698	23.7486	6.7129	0	0.000752	***
7@94.1:9@17.9	4	1825.1	2.2406	6.4039	1.8101	0.035	0.157164
2@18.1:6@100.3:7@94.1	2	109.6	0.1513	0.3846	0.2174	0.706	0.806052
2@18.1:6@100.3:9@17.9	2	3601.7	3.9944	12.6373	7.1443	0	0.003367	**
2@18.1:7@94.1:9@17.9	2	1270.6	1.6161	4.4582	2.5204	0.024	0.099894	.
6@100.3:7@94.1:9@17.9	2	1306.7	1.6581	4.5848	2.5919	0.022	0.094093
2@18.1:6@100.3:7@94.1:9@17.9	1	0	0	0	0	1	1
